# Supplementary material for: Fabrication of nano-sized attapulgite-based aerogels as anode material for lithium ion batteries
Source: Springer Nature journal article supplement (doi:10.1007/s10853-017-1623-3), 2017-10-05
Supplement: MOESM1 [file 15112480]

**Fabrication of nano-sized attapulgite-based aerogels**

**as anode material for lithium ion batteries**

Ye Lan, Dajun Chen *

State Key Laboratory for Modification of Chemical Fibers and Polymer Materials, College of Materials Science and Engineering, Donghua University, Shanghai 201620, PR China

*Corresponding author: Dajun Chen

E-mail address: [cdj@dhu.edu.cn](mailto:cdj@dhu.edu.cn) (D. Chen).

Telephone: 0086-21-67792891

Fax: 0086-21-67792855





**Fig. S1** XRD patterns of AT, AT/PVA, AT-25 and PAN





**Fig. S2** Simultaneous occurrence of cyclization and dehydrogenation

in the process of pre-oxidation

**
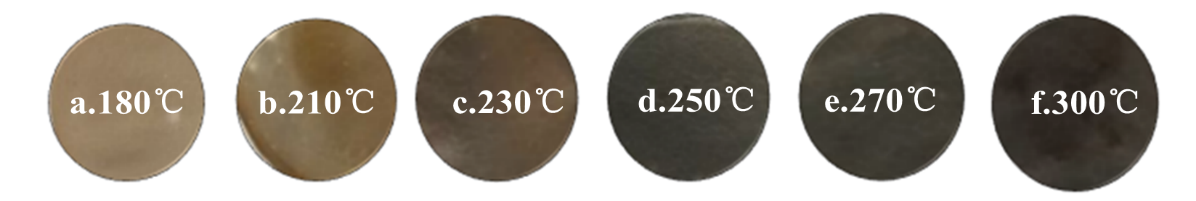
**

**Fig. S3** Change in color of AT-25 sintered at different temperatures


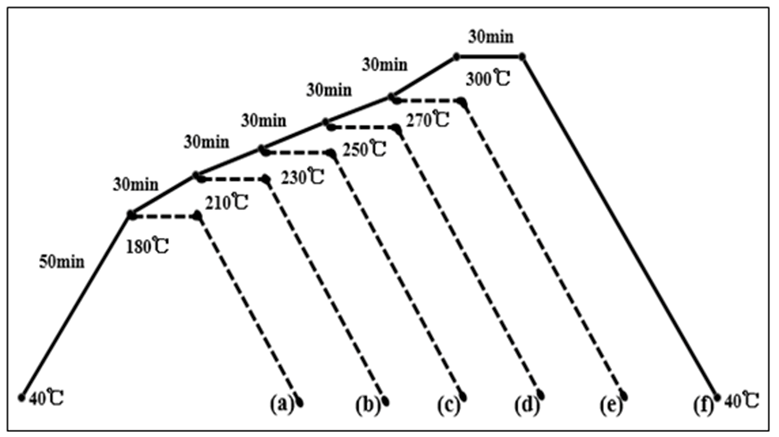


**Fig. S4** Pre-oxidation process of AT-25 at different temperatures


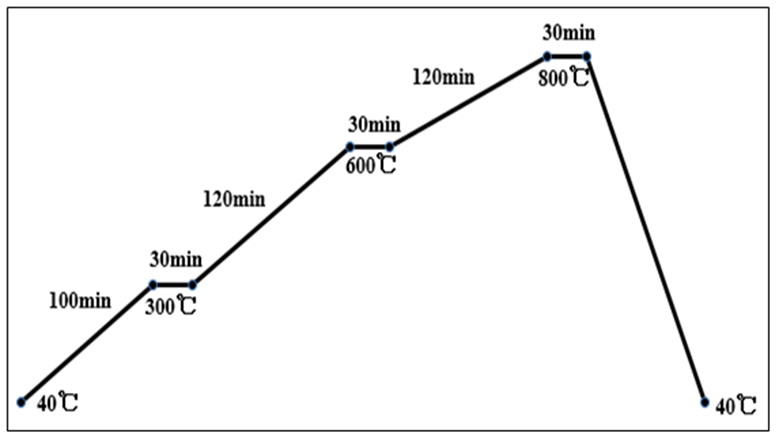


**Fig. S5** Carbonization process of OAT-25





**Fig. S6** Rating performance diagram of AT-25





**Fig. S7** Rating performance diagram of OAT-25
